# Supplementary material for: OH-initiated oxidation of sub-micron unsaturated fatty acid particles
Source: Royal Society of Chemistry journal article supplement (doi:10.1039/c3cp52655k), 2013-01-01
Supplement: c3cp52655k.pdf [file c3cp52655k.pdf]

## Supporting Information: OH-initiated oxidation of sub-micron unsaturated fatty acid particles

Theodora Nah<sup>1,2</sup>, Sean H. Kessler<sup>3</sup>, Kelly E. Daumit<sup>4</sup>, Jesse H. Kroll<sup>3,4</sup>, Stephen R. Leone<sup>1,2,5</sup>, and Kevin R. Wilson<sup>2,\*</sup>

<sup>1</sup>Department of Chemistry, University of California, Berkeley, CA 94720, USA

<sup>2</sup>Chemical Sciences Division, Lawrence Berkeley National Laboratory, Berkeley, CA 94720, USA

<sup>3</sup>Department of Chemical Engineering, Massachusetts Institute of Technology, Massachusetts 02139, USA

<sup>4</sup>Department of Civil and Environmental Engineering, Massachusetts Institute of Technology, Massachusetts 02139, USA

<sup>5</sup>Department of Physics, University of California, Berkeley, CA 94720, USA

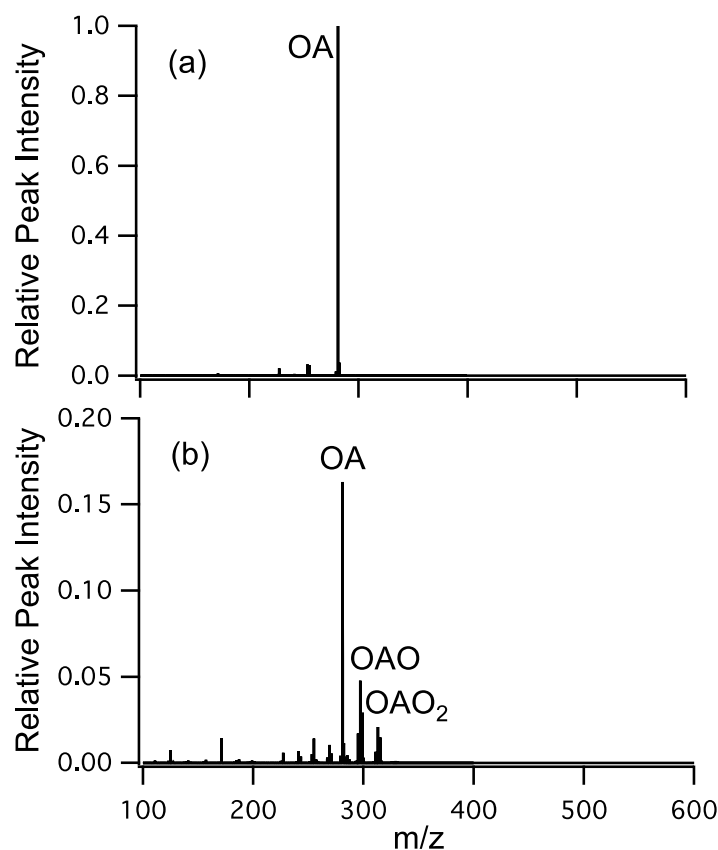

**Figure S-1** The negative-ion APCI mass spectrum of oleic acid (OA) particles from m/z 100 to 600. No peaks are observed above the background at masses lower than m/z 100. (a) Before reaction, the main peak observed in the spectrum is the oleic acid parent ion ( $[M-H]^-$ , m/z 281). (b) After reaction with OH radicals ( $\sim 2.4 \times 10^{11}$  molecule  $\text{cm}^{-3}$  s) at  $[\text{H}_2\text{O}_2] = 20.7$  ppm and  $[\text{O}_2] = 10\%$ , the oleic acid peak intensity decreases and higher molecular weight oxygenated reaction products are formed. The groups of higher molecular weight oxygenated reaction products are denoted as OAO, OAO<sub>2</sub> and OAO<sub>3</sub>

respectively to denote the number of oxygen atoms added to the oleic acid molecule. The mass spectra are normalized to the initial oleic acid peak intensity before reaction.

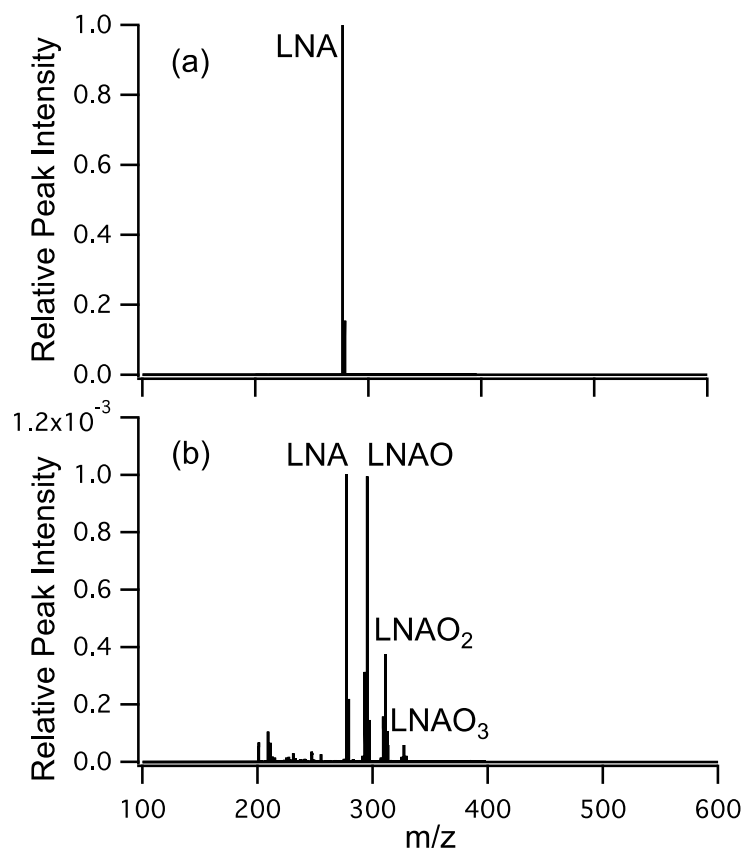

**Figure S-2** The negative-ion APCI mass spectrum of linolenic acid (LNA) particles from  $m/z$  100 to 600. No peaks are observed above the background at masses lower than  $m/z$  100. (a) Before reaction, the main peak observed in the spectrum is the linolenic acid parent ion ( $[M-H]^-$ ,  $m/z$  277). (b) After reaction with OH radicals ( $\sim 2.6 \times 10^{11}$  molecule  $\text{cm}^{-3}$  s) at  $[\text{H}_2\text{O}_2] = 20.7$  ppm and  $[\text{O}_2] = 10\%$ , the linolenic acid peak intensity decreases and higher molecular weight oxygenated reaction products are formed. The groups of higher molecular weight oxygenated reaction products are denoted as LNAO, LNAO<sub>2</sub> and LNAO<sub>3</sub> respectively to denote the number of oxygen atoms added to the linolenic acid molecule. The mass spectra are normalized to the initial linolenic acid peak intensity before reaction.

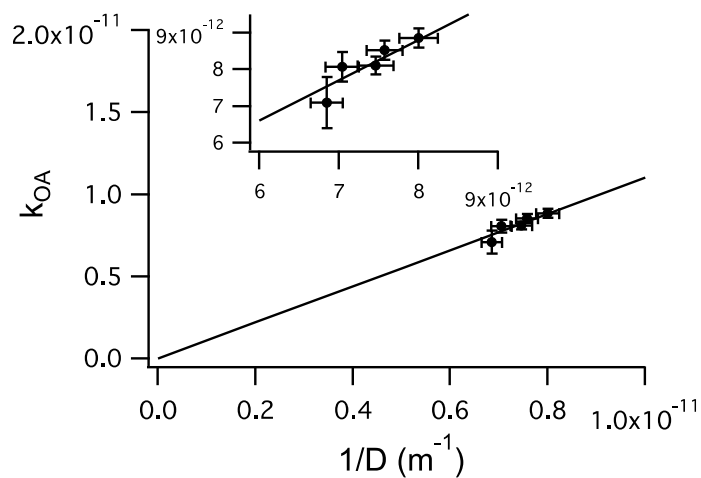

**Figure S-3** Rate constant  $k_{\text{OA}}$  for oleic acid ( $k_{\text{OA}}$ ) as a function of inverse particle diameter ( $1/D$ ), measured at 2 ppm  $[\text{H}_2\text{O}_2]$  and 5 %  $[\text{O}_2]$ . The uncertainties represent the standard deviations of each individual measurement. The linear fit to the data set indicates that  $k_{\text{OA}}$  is inversely dependent on the particle diameter. The figure inset shows the magnified view of  $k_{\text{OA}}$  vs.  $1/D$ .

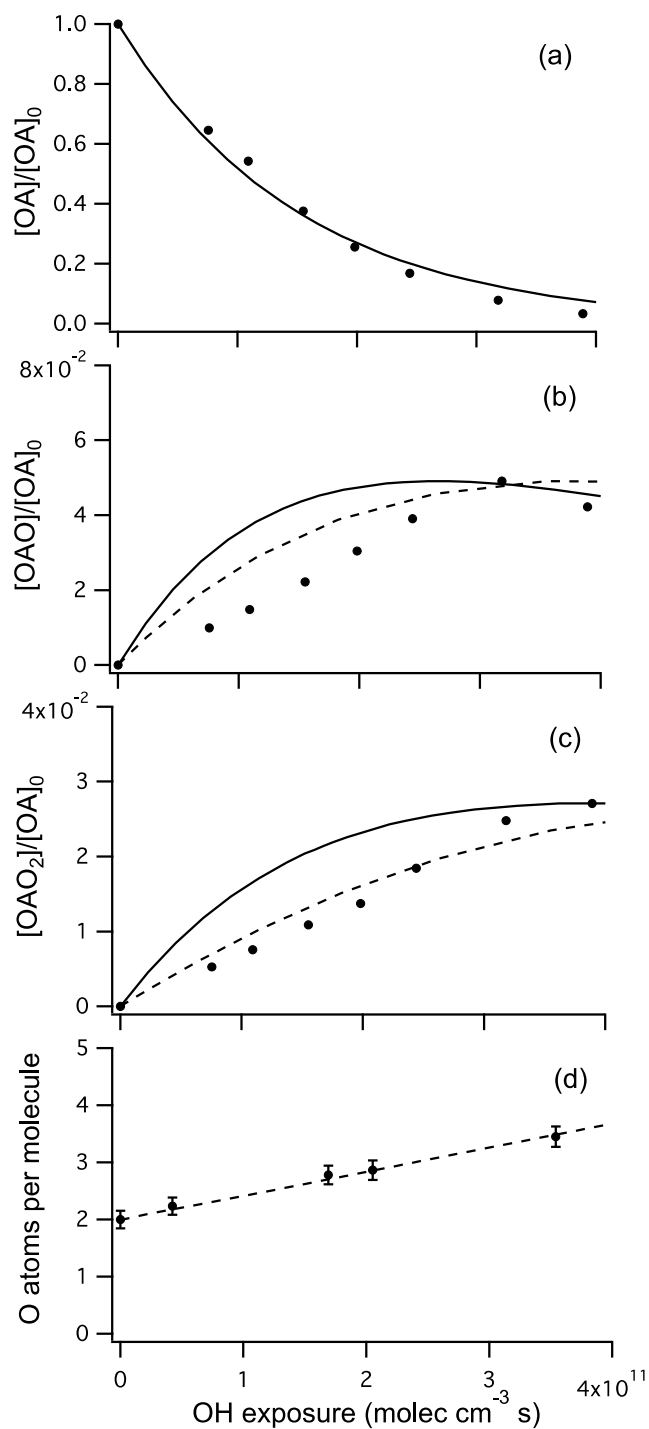

**Figure S-4** (a) to (c) The kinetic evolution of oleic acid, OAO and  $\text{OAO}_2$  as a function of OH exposure at  $[\text{H}_2\text{O}_2] = 20.7 \text{ ppm}$  for  $[\text{O}_2] = 10 \%$ . In panel (a), the decay of oleic acid is fit using Eq. (3) to obtain  $k_{\text{OA}}$  (solid line). In panels (b) and (c), the OAO and  $\text{OAO}_2$  data sets are fit (dashed lines) using  $k_{\text{OA}}'$  (*i.e.*  $k_{\text{OA}}' = 0.38 \times k_{\text{OA}}$ ) as described in the text. The solid lines in panels (b) and (c) are model predictions calculated using SAR, which

serve as a comparison to the measured product evolutions. (d) Average number of oxygen atoms per oleic acid molecule as a function of OH exposure at  $[\text{H}_2\text{O}_2] = 20.7$  ppm for  $[\text{O}_2] = 10\%$ . The uncertainties represent the standard deviations of individual measurements made at each OH exposure. The measured data are compared with predictions (dashed line) using  $k_{OA}'$  and the assumption that first generation higher molecular weight oxygenated reaction products with one and two added oxygenated functional groups are formed with equal probability.

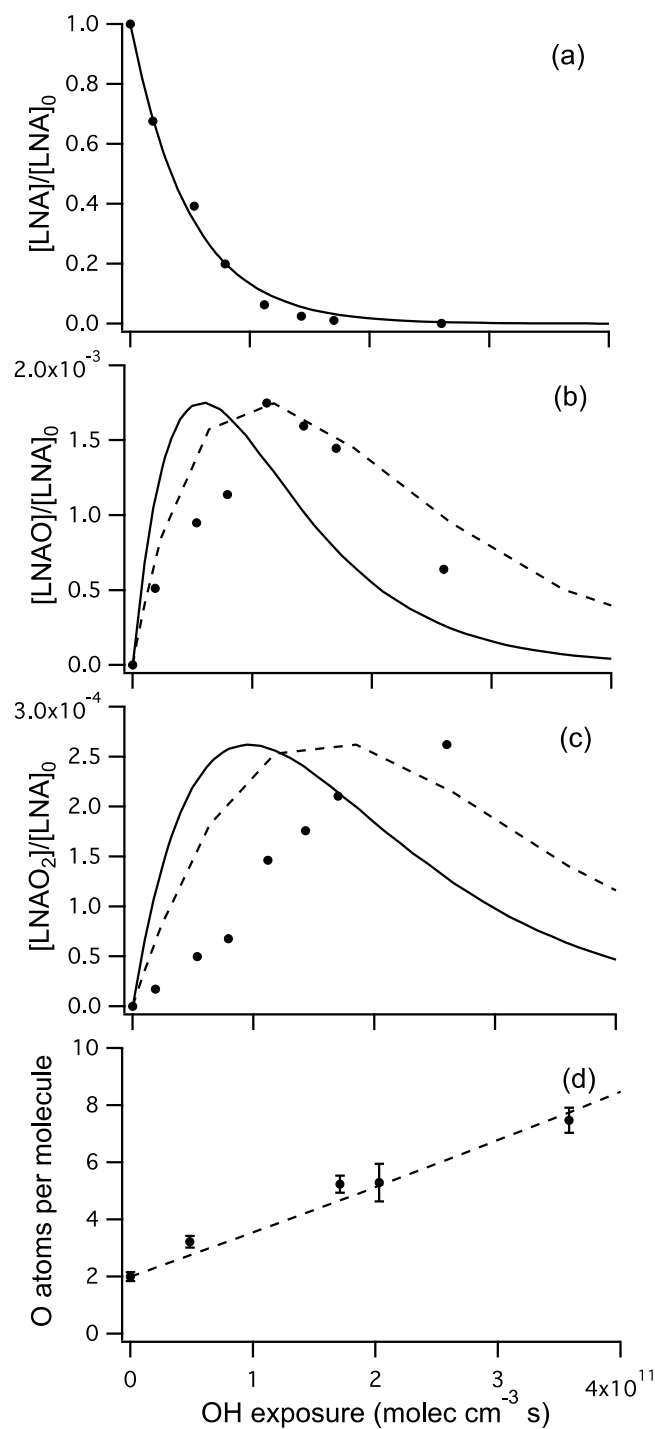

**Figure S-5** (a) to (c) The kinetic evolution of linolenic acid, LNAO and LNAO<sub>2</sub> as a function of OH exposure at [H<sub>2</sub>O<sub>2</sub>] = 20.7 ppm for [O<sub>2</sub>] = 10 %. In panel (a), the decay of linolenic acid is fit using Eq. (3) to obtain  $k_{LNA}$  (solid line). In panels (b) and (c), the LNAO and LNAO<sub>2</sub> data sets are fit (dashed lines) using  $k_{LNA}'$  (*i.e.*  $k_{LNA}' = 0.46 \times k_{LNA}$ ) as described in the text. The solid lines in panels (b) and (c) are model predictions calculated

using SAR, which serve as a comparison to the measured product evolutions. (d) Average number of oxygen atoms per linolenic acid molecule as a function of OH exposure at  $[H_2O_2] = 20.7$  ppm for  $[O_2] = 10$  %. The uncertainties represent the standard deviations of individual measurements made at each OH exposure. The measured data are compared with predictions (dashed line) using  $k_{LNA}$  and the assumption that first generation higher molecular weight oxygenated reaction products with one and two added oxygenated functional groups are formed with equal probability.
